# Supplementary material
Source: Springer Nature journal article supplement (https://www.springermedizin.de/resource/supplementary/12891_2001_14_MOESM8_ESM.pdf/9510336)

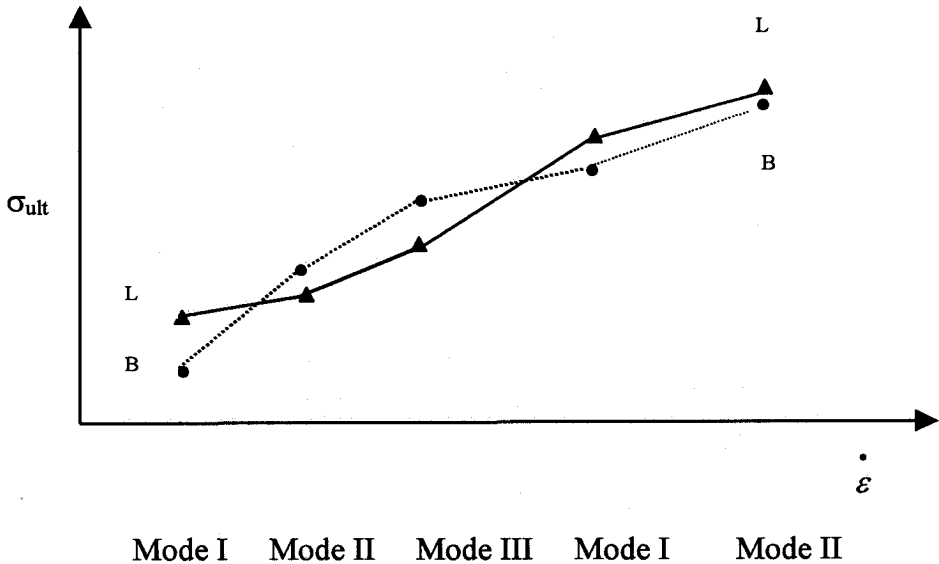

Supplement: MOESM8 [file 9510336]
